# Supplementary material for: Chitinase-3-like 1 is a biomarker of acute kidney injury and mortality in paediatric severe malaria
Source: Malar J. 2018 Feb 15;17:82. doi: 10.1186/s12936-018-2225-5 (PMC5815237; doi:10.1186/s12936-018-2225-5)
Supplement: Supplementary file 1 — Additional file 1. Dataset for malaria, CHI3L1, acute kidney injury, and mortality. [file 12936_2018_2225_MOESM1_ESM.xls]

## Sheet: Sheet1
studyid	treatment	age	male	haz	waz	length	weight	temp	pulse	sysbp	diabp	rr	fever_adm	bcs	deepbreathing	shock	conv	coma	hemoglobinuria	jaundice	sevcriteria_number	aki	akistage	hb	wbc	plt	parasit0	glucose	lactate	creatinine	bun	cysc_adm	na	k	cl	ph	baseexcess	hco3	deathinhospital	death6month	death6month1	death6month2	death6month3	death6month4	chi3l1_d1	chi3l1_d2	chi3l1_d3	chi3l1_d4	chi3l1_d14
1	Placebo group	1	1	3	0	84	9.4	38.6	88	110	40	52	Yes	5	No	No	Yes	No	No	No	1	0	0	6.5	7.7	46	51200	7.3	2	30		2.0271				6.947	-28	4.5	Discharged alive	0	0	0	0	0	130.872	112.354	67.743	55.055
2	Nitric Oxide group	1	1	0	-1	74	8	36.3	112	90	60	41	Yes	1	No	No	Yes	Yes	No	No	4	1	3	7	9.6	26		4.2	3.4	77		1.42121				7.43	2	26.1	Discharged alive		1	0	1	0	519.931	285.226	341.222	126.87
3	Nitric Oxide group	3	1	1	-1	97	12	38.8	125	110	60	43	Yes	2	No	No	Yes	Yes	No	No	4	0	0	6.5	11.4	123	14200	6.9	1.8	42						7.481	-3	20.1	Discharged alive	0	0	0	0	0	51.096	64.479	50.181	77.304
4	Placebo group	8	0		-1	46.5	20	37.7	138	120	80	44	Yes	1	No	No	Yes	Yes	No	No	3	0	0	8.8	10.8	193	9120	5.3	3	37		1.21611				7.313	-10	16.1	Discharged alive				1	0	295.649	154.455	77.741	54.277
5	Placebo group	2	0	0	-1	86	11	37.2	136	120	70	36	Yes	1	No	No	Yes	Yes	No	No	3	0	0	8.4	11.7	11	40800	5.3	2.3	38		1.08094				7.422	-3	21.5	Discharged alive	0	0	0	0	0	132.695	113.637	38.135	25.927
6	Nitric Oxide group	1	1	0	0	75	10	38.6	130	110	60	100	Yes	2	No	No	Yes	Yes	No	Yes	4	0	0	3.8	7.5	61	58000	4.7	3.3	19		0.988924				7.499	-5	17.9	Discharged alive	0	0	0	0	0	199.736	4.5	49.521	43.018
7	Nitric Oxide group	1	1	3	1	83	11	36.9	180	130	50	80	Yes	3	Yes	No	Yes	No	Yes	No	5	1	3	4	12.4	23	89600	3.7	3.1	169	140	4.78776				7.309	-8	18	Discharged alive	0	0	0	0	0	1709.03	969.485	347.262	162.766	91.503
8	Placebo group	5	1	-2	-1	100	16	36	100	100	60	24	Yes	2	No	No	Yes	Yes	No	No	3	0	0	6.1	6.4	39	6000	7.4	3	34	12	0.752445	129		102	7.416	0	24.6	Discharged alive				1	0	314.824	241.08	240.36	67.69	161.356
9	Placebo group	6	1		-2		16	39.8	136	100	60	42	Yes	2	No	No	Yes	Yes	No	No	4	0	0		5.2	61	79680	6.3	1.5	39		0.924295				7.456	-5	19.3	Discharged alive				1	0	84.597	111.373	81.645	82.369	115.08
10	Placebo group	1	1	-2	0	70	10	37.8	180	110	70	100	Yes	4	No	No	Yes	No	No	No	5	1	2		18.2	16	840	8.1	17.3	44	21	1.64461	134	4.3	99	7.446	-7	17.3	Discharged alive	0	0	0	0	0	709.157	506.069	124.609	79.633	86.077
11	Nitric Oxide group	4	0	-1	-2	97	13	39.2	180	120	60	42	Yes	3	No	No	No	No	No	No	1	0	0		5.9	34	132600	3.7	1.6	34	12	1.17128	134		112	7.113	-13	16.6	Discharged alive		1	0	1	0	890.365	942.934	234.269	101.122	252.144
12	Placebo group	1	0		-2		7.1	37	120	120	60	50	Yes	2	Yes	No	No	Yes	No	No	5	0	0	4.5	18	28	60800	7	7.9	18	16	1.19075	141	3.4	112				Discharged alive	0	0	0	0	0	163.833	206.264	57.756	62.958	33.504
13	Placebo group	2	0	1	0	90	13	36.1	126	100	40	32	Yes	3	Yes	No	Yes	No	No	No	4	0	0	6.8	4.9	60	6080	6.4	2.4	25	11	1.3695	135	3.5	104	7.429	-6	18.5	Discharged alive	0	0	0	0	0	242.127	288.219	178.804	173.746	288.799
14	Placebo group	6	0		-2		15	36	136	110	60	40	Yes	1	Yes	Yes	Yes	Yes	No	No	6	1	1	5.1	2.6	29	1360	7.4	4.5	46	8	1.17645	144	3.7	113	7.353	-4	21.3	Discharged alive				1	0	208.298	471.663	171.652	145.502	105.982
15	Nitric Oxide group	1	1	2	1	79	11	36.6	170	160	40	76	Yes	3	Yes	No	No	No	No	No	5	1	2	1.6	8.8	57	1760	5	9.6	18	13	1.3134	136	5.8	115	7.24	-18	9.5	Discharged alive		1	0	1	0	381.787	269.035	147.437	72.513	103.882
16	Placebo group	1	0		0		10	38.8	155	100	70	66	Yes	4	No	No	Yes	No	No	No	5	1	3	3.6	3.7	112	58880	20.9	5.6	150	58	1.03185	135	3.1	106	7.369	-12	13.2	Discharged alive	1	1	1	1	1	490.644	326.836	136.431	64.591
17	Nitric Oxide group	1	0	-2	-1	70	9	38.3	216	130	60	66	Yes	2	Yes	No	Yes	Yes	No	No	6	1	1	6.5	25.9	55	112640	6.4	5.7	36	30	1.44935	143	5.5	116	7.321	-15	11.1	Discharged alive	0	0	0	0	0	414.688	156.389	63.067	79.633	47.901
18	Nitric Oxide group	3	0	-3	-2	82	12	36.3	124	100	60	32	Yes	3	Yes	No	Yes	No	No	No	3	0	0	11.8	22.7	180	50080	7.5	1.7	24	23	1.51141	134	4.2	107	7.3	-12	14.4	Discharged alive	0	0	0	0	0	74.898	83.457	49.828	59.453	34.91
19	Placebo group	1	1	3	1	83	11	39.1	180	110	60	42	Yes	3	Yes	No	Yes	No	No	No	4	0	0	4.8	11.6	52	23200	10.2	3.9	29	9	1.21222	138	3.3	103	7.412	-3	21.3	Discharged alive	0	0	0	0	0	305.77	316.363	133.209	62.348	65.354
20	Nitric Oxide group	1	0	1	1	76	11	39	156	120	60	38	Yes	3	No	No	Yes	No	No	No	2	0	0	3.4	7.7	50	121040	5.1	4.6	19	10	1.35973	138	4.6	106	7.503	-3	19.7	Discharged alive	1	1	1	1	1	136.793	53.426	75.543	58.607	43.843
21	Placebo group	1	1		-1	128	8	36.3	142	80	50	42	Yes	4	No	No	Yes	No	No	Yes	4	0	0	3.1	16.6	65	0	6.3	2.6	29		1.16	139	4.1	108	7.315	-5	20.8	Discharged alive	0	0	0	0	0	343.408	148.973	91.82	188.578	94.341
22	Placebo group	1	0	3	0	82	10	39	155	130	60	44	Yes	2	No	No	Yes	Yes	No	Yes	5	0	0	1.5	14.4	255	0	6	1.6	26	26	1.85125	137	4.8	108	7.423	-10	14.1	Discharged alive	1	1	1	1	1	530.768	66.147	104.675	58.969	125.437
23	Placebo group	1	1	1	0	78	10	37	141	100	50	46	Yes	4	No	No	Yes	No	No	No	3	0	0	4.1	22.6	117	103040	6.1	4.1	19	20	1.29543	138		114	7.127	-17	12.4	Discharged alive	0	0	0	0	0	151.268	101.955	77.781	70.13	41.724
24	Placebo group	1	0	0	0	74	10	39	175	140	70	54	Yes	3	No	No	Yes	No	No	No	3	0	0	3	12.3	81	54760	9.4	4	18	7	0.676348	133		106	7.146	-14	14.8	Discharged alive	0	0	0	0	0	143.938	126.603	53.21	39.301	74.168
25	Nitric Oxide group	4	1	-1	0	100	17	37.9	178	100	60	58	Yes	2	Yes	No	Yes	Yes	No	No	6	1	2	7.6	12.6	16	194760	4.2	16	69		1.54513				7.168	-19	9.8	Discharged alive		1	0	1	0	1101.07	1004.7	573.486	99.263
26	Nitric Oxide group	2	0		-1		11	37.2	176	130	40		Yes	4	Yes	Yes	No	No	No	No	6	1	3	4.7	5.4	16	592840	4.4	17	133	70	2.89056	133	5.3	103	7.292	-18	8.3	Died in-hospital	1	1	1	1	1	2402.57
27	Placebo group	1	1	5	2	89	12	38	170	160	80	68	Yes	3	No	No	Yes	No	No	No	3	0	0	5.3	14	100	236800	7.1	5.1	29		1.11576				7.454	-7	17.2	Discharged alive	0	0	0	0	0	74.151	82.444	39.745	44.308	67.759
28	Placebo group	1	1	-2	-1	68	8	37.2	136	110	50	42	Yes	4	No	No	Yes	No	No	No	4	1	1	2.3	15.6	124	840	6.5	1.8	21		1.03185				7.354	-6	19.2	Discharged alive		1	0	1	0	135.168	118.847	63.067	99.241	78.867
29	Placebo group	6	1	-3	-3	103	14	38	150	100	60	32	Yes	2	Yes	No	Yes	Yes	No	No	5	0	0	2.9	3.8	93	3320	5.5	1.5	22		1.40706				7.467	0	23.3	Discharged alive				1	0	333.794	612.517	341.344	224.058	95.494
30	Placebo group	1	0	3	-2	84	8	37	173	170	70	40	Yes	2	No	No	No	Yes	No	No	3	0	0	2.8			13440	7.3	2.3	29	28		148	4	118	7.334	-11	15	Died in-hospital	1	1	1	1	1	237.298	219.495
31	Nitric Oxide group	3	1	-1	-1	92	13	36.5	128	100	60	30	Yes	2	No	No	Yes	Yes	No	No	4	1	2	5.8	8.1	233	240	7.4	2	38	10	1.09486	148	3.2	114	7.428	-3	21.4	Discharged alive	0	0	0	0	0	551.689	196.714	106.698	287.023	166.855
32	Nitric Oxide group	3	1	0	1	94	16	36.2	162	140	70	56	Yes	2	No	No	No	Yes	No	No	4	1	1	3.2	31.5	199	0	10.3	4.6	40	29	1.2624	139	5.2	115	7.427	-14	10.6	Discharged alive	0	0	0	0	0	754.629	812.896	229.744	93.92	276.872
33	Nitric Oxide group	4	0	-2	0	95	16	38.8	154	110	80	46	Yes	2	No	No	Yes	Yes	No	No	6	1	3	4.7	7.7	35	400	9.6	10.2	45	26		137	4.3	109	7.382	-13	12.4	Discharged alive	0	0	0	0	0	558.565	776.344	296.559	135.492	128.679
34	Nitric Oxide group	1	1	-2	-2	70	8	36.6	156	110	70	59	Yes	2	Yes	No	Yes	Yes	No	No	7	1	1	4.6	21.8	64	108520	13.5	10.6	34	38	1.62938	141	4.3	114	7.33	-19	7.3	Died in-hospital	1	1	1	1	1	2054.85
35	Placebo group	4	0	-2	1	96	18	38	170	140	80	42	Yes	2	No	No	Yes	Yes	No	No	5	1	1	4.6	10.4	22	244800	5.4	1.7	39	18	0.911984	143	3.5	111	7.467	-6	17.7	Discharged alive		1	0	1	0	134.077	108.305	55.855	44.059	49.381
36	Nitric Oxide group	1	1	-3	-1	67	9	38.8	204	120	40	44	Yes	2	Yes	No	Yes	Yes	No	No	5	1	2	5.5			43636	6.8	4	46	18	1.5069	132	3.9	101	7.136	-10	19	Discharged alive	0	0	0	0	0	122.889	151.72	83.809	69.334	124.652
37	Nitric Oxide group	1	1	-6	-2	60	8	37.8	190	130	70	62	Yes	2	Yes	No	Yes	Yes	No	No	7	1	2	2	42.1	94	37200	6.7	5.4	30	20	1.31317	140	4	110	7.44	-10	14.6	Discharged alive	0	0	0	0	0	912.683	511.319	212.459	94.337	89.956
38	Placebo group	3	0		0		15	36.7	125	110	60	38	Yes	4	Yes	No	Yes	No	No	No	4	1	1	6.4	8.8	76	189440	7.4	1.7	28	6	0.964567	132	3.6	101	7.418	-5	19.7	Discharged alive	0	0	0	0	0	395.444	244.982	116.514	113.635	47.072
39	Placebo group	2	0	-3	-2	76	9	38.1	110	110	60	28	Yes	2	Yes	No	Yes	Yes	No	No	6	0	0	2.5				6.5	9.5		6								Discharged alive	0	0	0	0	0	156.981	436.495	119.922	43.993	97.522
40	Placebo group	6	0	-2	1	104	25	37.7	120	110	70	30	Yes	3	Yes	No	Yes	No	No	Yes	8	1	3	2.3	17.8	48	42720	1.7	14.9	58	59	1.05438							Discharged alive				1	0	1439.87	2624.88	808.001	134.444	236.299
41	Nitric Oxide group	2	1	-3	-2	76	9	37.5	148	110	60	52	Yes	3	Yes	No	Yes	No	No	No	4	0	0	3.7	24.1	297	33600	3.4	2.1			2.13696							Discharged alive	0	0	0	0	0	275.814	192.185	80.25	45.843	59.235
42	Placebo group	3	1	-2	-1	89	13	35.5	138	120	80	28	Yes	3	No	No	Yes	No	No	No	2	0	0	7.2	12.8	71	119760	6.7	1.5	28		0.962479				7.237	-12	15.6	Discharged alive	0	0	0	0	0	136.216	74.353	54.542	75.251	81.255
43	Placebo group	4	0		0		16	39	161	120	70	50	Yes	2	No	Yes	Yes	Yes	No	No	5	0	0	2.8	33.4	117	72480	5.3	2.8	18		1.21951				6.962	-21	10.6	Discharged alive	0	0	0	0	0	540.207	137.476	83.892	61.449	172.448
44	Placebo group	4	1	0	0	100	17	38.9	170	130	60	30	Yes	3	No	No	Yes	No	No	No	1	0	0	7.4	4.6	25	163680	6.8	2	42		0.754216				7.417	-3	21.3	Discharged alive		1	0	1	0	308.539	388.553	91.709	110.888	62.481
45	Nitric Oxide group	1	1	0	0	77	10	38	190	100	50	45	Yes	1	No	No	Yes	Yes	No	No	5	1	2	3.5	16	5	480	7.1	2.6	32		1.17303				7.393	-5	19.5	Discharged alive	0	0	0	0	0	468.583	235.302	97.264	140.032	358.626
46	Placebo group	1	0	3	0	83	10	39	143	120	60	60	Yes	3	No	No	Yes	No	No	No	2	0	0	5.2	9.7	42	54560	4.7	2.2	28		0.573587				7.43	-6	17.8	Discharged alive	0	0	0	0	0	75.042	125.791	75.878	78.705	44.426
47	Nitric Oxide group	1	0	0	-1	74	9	37	153	110	50	30	Yes	3	No	No	Yes	No	No	No	4	1	1	2.6	22.1	19	14200	5.9	4	24		0.871715				7.077	-12	17.7	Discharged alive	0	0	0	0	0	29.049	32.282	35.872	25.555	49.04
48	Nitric Oxide group	2	0	0	0	84	13	39	196	150	70	80	Yes	2	No	No	Yes	Yes	No	No	6	1	1	8.7	7.3	3	366000	6.4	6.3	31		1.43173				7.369	-8	17	Discharged alive	0	0	0	0	0	179.817	79.904	98.377	118.414	32.744
49	Placebo group	6	1	-2	0	107	21	38.2	96	100	70	30	Yes	2	No	No	Yes	Yes	No	No	3	0	0	5	5.7	98	151040	6.8	2.2	28		0.921432				7.415	-1	23.4	Discharged alive				1	0	494.533	401.99	195.942	130.396	145.868
50	Nitric Oxide group	1	0	-3	-1	67	8	37	152	110	50	78	Yes	2	Yes	No	Yes	Yes	No	No	5	0	0	4.6	12.5	21	124480	7.7	3.2	30		1.48916							Discharged alive	0	0	0	0	0	505.416	458.721	175.475	142.881	79.519
51	Nitric Oxide group	2	1	-1	0	83	13	38.4	186	150	50	36	Yes	3	No	No	Yes	No	No	No	5	0	0	4.8	5.9	65	16680	8.5	6.4	24		1.24716				7.379	-9	15.8	Discharged alive	0	0	0	0	0	1153.9	777.227	327.287	360.909	265.505
52	Placebo group	1	0	-2	0	69	10	37	180	140	70	38	Yes	2	No	No	Yes	Yes	Yes	No	5	0	0	4.2	27.1	64	28120	9.5	3.9	21		0.823249				7.366	-4	21.4	Discharged alive	0	0	0	0	0	114.853	112.892	53.419	41.605	97.264
53	Nitric Oxide group	1	1	4	3	86	14	37.1	160	120	70	34	Yes	0	Yes	No	Yes	Yes	Yes	No	5	0	0	7	11.2	14	800	7.2	1.2	19		1.13314				7.042	-11	19.8	Discharged alive	0	0	0	0	0	20.972	24.011	55.697	29.934	22.688
54	Nitric Oxide group	2	0	-2	0	79	13	40.3	159	130	50	74	Yes	2	Yes	No	Yes	Yes	No	No	5	0	0	3.3	17.9	77	55760	8.6	1.1	23						7.409	-4	20.3	Discharged alive		1	0	1	0	171.965	259.466	121.297	117.404	64.597
55	Placebo group	1	0	-2	-1	68	8	40.8	173	160	80	46	Yes	2	No	No	Yes	Yes	No	No	5	1	1	3.1	19.6	79	8720	9.8	2.31	28	13	1.07934	135	4	110	7.398	-13	11.5	Discharged alive	0	0	0	0	0	193.723	153.949	173.732	58.189	88.243
56	Placebo group	1	1	-2	-1	72	9	36.6	115	130	80	48	Yes	2	No	No	Yes	Yes	No	No	6	1	1	4.8	4.4	117	0	5.9	1.7	42	9	1.92118	139	4.3	104	7.164	-12	16.7	Died in-hospital	1	1	1	1	1	53.785
57	Placebo group	1	0	-2	-1	70	9	37.2	164	100	60	52	Yes	4	No	No	Yes	No	No	No	4	0	0	2.8	5.1	60	1520	8.1	15.1	18	13	0.666535	141	4.8	110	7.288	-15	11.5	Discharged alive	0	0	0	0	0	120.346	196.801	43.954	57.063	123.465
58	Placebo group	4	1	-3	-2	90	13	39	154	110	60	50	Yes	2	No	No	Yes	Yes	No	No	5	1	1	2.8	9.8	81	7360	5.5	3.3	23	3	0.938495	140	3	101	7.451	-5	18.6	Discharged alive	0	0	0	0	0	215.673	225.712	57.532	41.604	81.495
59	Nitric Oxide group	2	1	-2	-4	80	8	39.6	160	110	60	62	Yes	2	No	No	Yes	Yes	No	No	3			5.8	9	154	43660			40	10	1.05306	142	3.6	112	7.446	-6	18.4	Discharged alive		1	0	1	0	147.277
60	Placebo group	2	1	-2	-1	77	11	39.8	152	100	40	38	Yes	3	No	No	No	No	No	No	3	0	0	2.5	4.6	12	102720	7.3	5.6	26.5		0.798038	137	2.9	106	7.502	-8	15	Discharged alive		1	0	1	0	152.636	158.929	65.101	64.673	70.618
61	Placebo group	3	1	-1	-2	90	11	37	162	100	60	56	Yes	3	No	No	No	No	No	No	2	0	0	3.4	8.6	10	720	4.9	3.6	36	25	1.67366	144	4.4	112	7.392	-7	17.7	Discharged alive	0	0	0	0	0	33.511	20.579	16.63	15.806	28.826
62	Nitric Oxide group	1	1	-1	0	73	10	40	164	120	70	76	Yes	2	Yes	No	Yes	Yes	No	No	4	0	0	5.4	18.2	42	40280	8	2.1	29	4	1.15183	134	3.3	103	7.386	-6	19.4	Discharged alive	0	0	0	0	0	94.932	99.762	108.128	81.495	59.335
63	Placebo group	3	0	1	1	98	16	36.8	150	130	80	38	Yes	4	No	Yes	No	No	No	No	4	0	0	2.8	23.6	127	0	9.1	4	28	3		137	4.6	111				Discharged alive	1	1	1	1	1	301.547	145.257	28.101	18.867	37.305
64	Nitric Oxide group	1	1	-2	-2	71	8	39	175	120	55	52	Yes	2	No	No	No	Yes	No	No	3	0	0	2.4	15	51	100800	4.2	3.3	28	7	1.33925	133	4.6	106	7.381	-9	16.5	Discharged alive	0	0	0	0	0	139.905	143.546	146.283	111.316	84.772
65	Placebo group	6	1	-3	-2	100	16	36	128	100	60	36	Yes	1	No	No	Yes	Yes	No	No	4	0	0	6.2	6.5	24	2760	5.8	1.5	45	13	1.24341	136	4.1	108	7.395	-6	18.8	Discharged alive				1	0	105.533	63.395	59.302	83.811	97.665
66	Nitric Oxide group	4	1	0	-4	102	10	37.8	156	170	100	56	Yes	3	No	No	Yes	No	Yes	Yes	4	0	0	3.5	11.6	207	10560	6	7.8	28	20	1.72038	139	4.6	110	7.442	-6	18.2	Discharged alive	1	1	1	1	1	224.616	147.099	88.569	67.457	51.746
67	Nitric Oxide group	2	1	0	-2	83	10	37	173	90	40	44	Yes	4	Yes	No	No	No	No	No	2	0	0	5.8	7.5	67	152160	10.6	6	35	29	1.31111	137	3.2	110	7.461	-5	18.9	Discharged alive	0	0	0	0	0	128.982	92.874	72.964	59.898	116.232
68	Nitric Oxide group	1	0	0	-2	75	8	37.5	176	90	70	76	Yes	3	Yes	No	No	No	Yes	Yes	5	0	0	2	17.6	13	27600	4.7	6.9	18	11	1.2138	140	4.2	114	7.297	-15	11.4	Discharged alive		1	0	1	0	1910.63	942.584	293.178	95.177	348.661
69	Nitric Oxide group	2	1	-1	0	82	12	36.6	186	90	40	82	Yes	2	Yes	Yes	No	Yes	Yes	Yes	7	1	2	5	14.1	342	72240	6.9	3.7	35	27	1.51332	134	4.7	110	7.321	-16	9.7	Died in-hospital	1	1	1	1	1	607.681	335.333	94.51	148.801
70	Placebo group	7	0	1	0	128	22	39	160	100	70	30	Yes	3	No	No	Yes	No	No	No	2	0	0	7.6	9.4	54	56480	6.4	3.1	56	13	1.16229	127	3.3	94	7.471	-4	20	Discharged alive				1	0	168.22	111.221	59.594	71.914	30.522
71	Nitric Oxide group	5	1	0	0	108	18	38.8	150	100	50	30	Yes	2	No	No	Yes	Yes	No	No	4	1	1	8	11.9	96	4240	7.1	1.8	58	17	0.884239	137	4.1	109	7.508	-6	17.4	Discharged alive				1	0	269.144	83.312	48.561	39.729	138.259
72	Nitric Oxide group	2	1	-3	0	76	13	37	109	90	70	24	Yes	3	No	No	Yes	No	No	No	3	1	1	5.8	7.8	31	3080	4.6	2.3	38	9	1.05032	135	5	103				Discharged alive	0	0	0	0	0	4.5	12.896	22.192	22.051	18.484
73	Placebo group	1	1	-5	-2	63	8	39.8	180	120	60	68	Yes	2	Yes	No	Yes	Yes	No	Yes	7	1	2	3	27.9	78	120	4.9	4.1	40	17	0.763196	139	4.7	105	7.467	-3	21.1	Discharged alive	0	0	0	0	0	203.578	193.274	97.098	48.553	56.059
74	Placebo group	3	0	1	0	97	15	39	179	120	80	40	Yes	4	No	No	Yes	No	No	No	3	0	0	4.8	5.8	34	142840	6.9	1.9	35	7	0.827443	131	3.9	100	7.559	-2	20.1	Discharged alive	0	0	0	0	0	132.947	117.676	58.668	43.484	79.357
75	Placebo group	2	0	-1	-1	80	11	38.3	161	140	60	40	Yes	2	No	No	Yes	Yes	No	No	5	1	1	6.8	21.4	142	15920	6.9	1.8	31	3	1.02978	134	3.8	99	7.413	-4	20.7	Discharged alive	0	0	0	0	0	60.44	72.85	58.569	49.138	34.369
76	Nitric Oxide group	2	0		0		12	39.2	185	110	50	42	Yes	2	Yes	No	Yes	Yes	No	No	6	0	0	3			15320	8.7	7.9	22	10	0.894212	133	4.1	102	7.522	-11	12.2	Discharged alive	0	0	0	0	0	128.141	103.927	60.582	33.108	33.288
77	Nitric Oxide group	3	1	-2	-1	88	12	36.9	132	110	70	50	Yes	2	Yes	No	Yes	Yes	No	No	7	1	3	3	30.6	114	18880	9.2	6.8	105	77		137	4.3	111	7.474	-12	11.7	Discharged alive	0	0	0	0	0	524.145	799.605	152.29	55.163	89.857
78	Placebo group	1	0		-2		8	37.6	130	100	60	60	Yes	2	Yes	No	No	Yes	No	No	5	1	1	4.4	12.4	34	30800	7.5	3	22	11	0.754071	138	4.3	107	7.465	-5	18.5	Discharged alive	0	0	0	0	0	93.901	86.648	33.783	28.16	9.428
79	Nitric Oxide group	1	1	-3	-1	65	8	39	90	110	70	48	Yes	1	No	No	Yes	Yes	No	No	4	0	0	3.5	7.9	50	71000	6.5	1.6	18	8	0.770433	135		107	7.563	-2	20.6	Discharged alive	0	0	0	0	0	204.113	135.765	84.743	79.35	130.205
80	Nitric Oxide group	2	0	-3	-1	75	11	39.3	168	100	70	50	Yes	2	Yes	No	Yes	Yes	No	No	4	0	0	6	5.9	57	101080	6.7	4.6	25	20	0.954291	138	4.4	108	7.421	-8	16.8	Discharged alive	0	0	0	0	0	20.194	4.5	12.725	11.919	32.381
81	Placebo group	1	1	-3	-2	68	8	37.7	160	120	60	62	Yes	1	Yes	No	No	Yes	No	No	6	1	3	4	32.7	326	33000	9.9	18.2	73	41	1.33197	137	5.7	113	7.246	-22	5	Discharged alive	0	0	0	0	0	1641.25	1365.4	422.907	135.773	252.01
82	Placebo group	1	1		-1		9.6	39.7	166	90	40	70	Yes	2	Yes	No	Yes	Yes	No	No	7	1	1	4.8	0.9	29	304000	2.5	6.6	39		1.75783				7.38	-11	13.6	Died in-hospital	1	1	1	1	1	522.144
83	Nitric Oxide group	3	1	-3	-2	85	12	38	134	110	55	56	Yes	2	Yes	No	No	Yes	No	No	6	1	1	2.8	21.5	213	2720	19	7.2	35	46	1.12949	147	3.9	120				Discharged alive	0	0	0	0	0	191.667	421.972	262.366	165.376	109.631
84	Nitric Oxide group	2	1	-4	-1	72	11	37.9	173	100	70	64	Yes	2	Yes	No	Yes	Yes	No	No	4	0	0	6.8			2200	5.3	0.9	27	6	0.557825	135	4.2	104				Discharged alive	0	0	0	0	0	9.266	7.057	6.169	10.649	12.278
85	Placebo group	3	1	-4	-2	81	12	37.6	162	160	50	82	Yes	0	Yes	Yes	Yes	Yes	Yes	Yes	9	1	1	3			72320	3.1	11.6	35		1.34915							Discharged alive	0	0	0	0	0	191.118	194.602	148.279	57.549	125.636
86	Nitric Oxide group	5	1	0	-1	108	17	38.2	173	110	70	68	Yes	3	No	Yes	Yes	No	No	No	6	0	0	4			109040	7.1	5.5	44		0.618781							Discharged alive	0	0	0	0	0	363.611	384.148	191.377	149.419	120.536
87	Placebo group	2	1	2	1	92	14	36.7	142	110	70	39	Yes	1	Yes	No	Yes	Yes	No	No	5	1	2	6.8			11760	6.1	1.4	47		1.25358							Discharged alive	0	0	0	0	0	33.429	63.136	37.357	29.931	36.858
88	Placebo group	1	0	-3	-3	67	7	38.7	180	90	40	80	Yes	1	Yes	No	Yes	Yes	No	No	7	1	2	2	44.5	162	33640	10.1	8.6	51		0.932645							Discharged alive	0	0	0	0	0	381.315	601.342	165.778	83.422	80.86
89	Placebo group	1	0	-2	2	71	12	35.7	172	70	40	88	Yes	0	Yes	Yes	No	Yes	No	No	7	1	1	2.8	34.2	273	23000	8.9	6.8	35		1.14716							Discharged alive	0	0	0	0	0	102.667	56.025	99.507	8.695	18.705
90	Placebo group	1	0	-2	-2	71	8	38.4	160	120	80	64	Yes	2	Yes	No	Yes	Yes	No	No	6	0	0	3	18.7	155	78000	5.6	8	18		0.993708							Discharged alive	0	0	0	0	0	160.69	288.276	67.515	43.217	27.26
91	Nitric Oxide group	1	0	-2	-2	71	8	38.2	183	110	50	68	Yes	1	Yes	Yes	Yes	Yes	No	No	8	1	1	2.5	19	65	31680	7.9	10.6	41		1.56126							Died in-hospital	1	1	1	1	1	85.166
92	Nitric Oxide group	1.41667	0	-4	0	69	11	39.5	167	100	50	73	Yes	3	Yes	No	Yes	No	Yes	Yes	6	1	1	4.4	19	59	10920	5.8	3.6	33		1.65368							Discharged alive	0	0	0	0	0	201.856	146.536	63.702	232.035	43.964
93	Nitric Oxide group	1	0	2	3	81	13	38.6	187	110	60	74	Yes	3	Yes	No	Yes	No	Yes	No	4	0	0	3	28	123	9600	6.3	2.1	23		0.841647							Discharged alive	0	0	0	0	0	13.602	13.425	37.423	20.211	24.055
94	Nitric Oxide group	2	0	-5	0	69	12	37.4	181	90	70	52	Yes	2	No	No	Yes	Yes	No	Yes	5	1	3	5.6	3	137	696320	5.2		28		1.43177							Discharged alive		1	0	1	0	1015.96	2624.88	949.699	230.704	488.563
95	Nitric Oxide group	9	1	-3	1	115	36	39.5	138	130	90	28	Yes	2	No	No	Yes	Yes	No	No	5	1	1	4.2	8.8	216	5920	5.2		56		0.840373							Discharged alive				1	0	89.328	160.238	132.166	115.759	72.056
96	Nitric Oxide group	2	1	-2	1	79	13	39.5	179	120	80	64	Yes	2	Yes	No	Yes	Yes	No	No	4	0	0	5.4	6.1	29	76000	5.1		30		1.00531							Discharged alive	0	0	0	0	0	216.905	179.732	163.421	97.117	107.899
97	Nitric Oxide group	4	0	-2	-1	96	14	40.3	179	100	60	48	Yes	4	No	No	No	No	No	No	3	1	1	3.4	4.9	80	163360	5.6		45		1.05032							Discharged alive	0	0	0	0	0	92.26	108.317	79.438	43.554	303.305
98	Nitric Oxide group	1.25	1	-4	-2	65	8	37.7	175	90	40	62	Yes	3	Yes	No	No	No	No	Yes	4	0	0	2.8	29.5	360	120	13	4.4	18	26	0.712549	145	4	116	7.405	-12	13	Discharged alive	0	0	0	0	0	87.488	162.975	125.629	100.925	135.063
99	Nitric Oxide group	1.5	1	-4	0	71	11	37.5	143	100	60	46	Yes	0	Yes	Yes	Yes	Yes	No	Yes	6	0	0		26	13	8640	9.6	2		3	0.778441				7.396	-2	22.6	Discharged alive	0	0	0	0	0	26.85	23.857	19.823	19.698	28.868
100	Placebo group	2.41667	1	-1	-1	85	11	37	154	120	70	30	Yes	3	No	No	Yes	No	No	No	1	0	0		10.2	132	7920	5.9	1.6	22	7	0.8062	139	4	104	7.518	3	25.5	Discharged alive	0	0	0	0	0	147.837	116.935	72.782	132.257	189.526
101	Placebo group	1	1	-3	-1	66	9	37.6	182	126	80	52	Yes	1	No	No	Yes	Yes	No	No	4	0	0	3.7	15.8	45	23600	2.5	2.4	18	13	0.620544	140	4	113	7.28	-14	13.1	Discharged alive	0	0	0	0	0	242.07	188.882	101.051	65.858	73.696
102	Nitric Oxide group	2.5	0	-2	-3	84	10	36.2	153	126	62	48	Yes	2	Yes	No	Yes	Yes	No	No	7	1	1	7.1	6.7	148	156160	2.7	13.5	44	45	2.54783	136		118	6.98	-28	4	Died in-hospital	1	1	1	1	1	730.701
103	Placebo group	4	0	0	-1	101	15	38.8	157	150	80	58	Yes	4	No	No	Yes	No	No	No	1	0	0		7.8	264	59200	6.9	1.6	22	7	0.688986	139	3.6	109	7.413	-8	16.8	Discharged alive	0	0	0	0	0	111.758	182.824	113.868	115.84	58.369
104	Placebo group	2	1	-2	-2	77	10	36.6	159	120	80	58	Yes	0	Yes	No	Yes	Yes	Yes	Yes	5	0	0		23.2	320	2440	12.4	3.1	33	38	0.872997	141	4.1	112				Discharged alive	1	1	1	1	1	322.027	310.912	50.962	51.098	119.608
105	Nitric Oxide group	1.25	1	-1	0	75	10	37.6	177	106	50	44	Yes	3	Yes	No	No	No	No		4	1	2	1.6	17.3	377	0	12.2	3	58	33	1.0828	147	4.2	119	7.444	-9	15.1	Discharged alive	0	0	0	0	0	108.326	112.083	52.242	37.836	45.706
106	Placebo group	2.25	1	-3	0	77	12	36.4	148	110	55	44	Yes	2	No	No	Yes	Yes	No	No	4	0	0	3	20.3	29	56160	9.8	3.5	18	4	0.652649	130	3.5	96				Discharged alive	0	0	0	0	0	464.763	502.017	209.33	873.062	139.753
107	Nitric Oxide group	1.08333	0	-5	-4	63	6	37.3	183	90		75	Yes	1	Yes	No	Yes	Yes	No	No	7	0	0	2.8	5	79	2080	2.6	10.6	18	3	1.1553	145	4.9	118	7.292	-16	10.5	Died in-hospital	1	1	1	1	1	1023.34
108	Nitric Oxide group	1.16667	1	-3	-2	69	8	38.4	158	125	80	78	Yes	2	No	No	Yes	Yes	No	No	3	0	0	6.1	23.3	29	7600	5.8	4.4	23	8	0.806527	136	4.9	106	7.545	-3	19.7	Discharged alive	0	0	0	0	0	644.962	456.135	82.746	65.595	74.602
109	Nitric Oxide group	5	1	1	0	113	18	35	117	100	60	20	Yes	3	No	No	Yes	No	No	No	3	1	3		6.2	74	2640	7.1	1.5	150	43	1.8853	139	3.8	105	7.419	0	24.3	Discharged alive				1	0	345.954	306.926	103.138	180.04	122.762
110	Nitric Oxide group	1.33333	0	-2	0	74	11	39.1	118	110	60	56	Yes	2	No	No	Yes	Yes	Yes	No	5	1	3	4.4	4.2	59	35440	6.3	4	32	13	1.10269	132	4.2	101	7.428	-3	21.5	Discharged alive	0	0	0	0	0	923.647	1519.58	839.238	542.794	80.026
111	Placebo group	2.5	1	-2	-1	83	12	37	144	130	60	52	Yes	3	No	No	No	No	No	Yes	3	0	0	8.2	11.1	47	2840	3.9	2.3	18	7	0.905834	124	3.6	98	7.346	-15	10.7	Discharged alive	0	0	0	0	0	612.899	353.29	261.778	181.782	121.93
112	Nitric Oxide group	1.66667	0	-3	-1	74	11	38.1	146	120	70	46	Yes	2	No	No	Yes	Yes	No	No	3	0	0	6.7	5.7	72	4400	5.5	3.4	29	16	0.79793	136	4.3	106	7.417	-8	16.3	Discharged alive	0	0	0	0	0	26.601	29.374	23.296	35.014	57.976
113	Nitric Oxide group	2	0	-2	-2	80	10	38.4	179	100	50	97	Yes	2	No	No	Yes	Yes	No	No	4	1	1		8.6	270	4480	7.7	2.6	38	27	0.846544	153	3.7	125	7.391	-11	14.2	Discharged alive		1	0	1	0	4.5	18.664	16.874	13.958	21.304
114	Placebo group	2	1	-2	-2	78	10	39.8	180	100	60	76	Yes	2	No	No	Yes	Yes	No	Yes	6	0	0	7.8	6.7	30	41680	10.2	6.4	26	10	0.744373	133	3.4	103	7.455	-9	14.7	Discharged alive		1	0	1	0	113.984	131.85	43.42	30.231
115	Nitric Oxide group	1.08333	1	-2	-1	71	9	37.1	175	120	60	30	Yes	3	No	No	Yes	No	Yes	No	3	0	0		19.8	37	96640	5.6	6.8	23	10	0.376903	136	3.2	102	7.436	-4	20.2	Discharged alive	0	0	0	0	0	193.013	154.78	72.331	33.868	43.149
116	Placebo group	2.16667	1	-3	-2	76	10	37.6	157	120	70	44	Yes	3	Yes	No	No	No	No	No	3	1	1		9.7	237	28000	6.2	1.6	42	26	1.07418	136	5.7	112	7.224	-19	9	Discharged alive	0	0	0	0	0	123.919	102.307	45.237	46.707	108.519
117	Placebo group	1.33333	0	0	-1	80	10	38.9	195	120	55	68	Yes	1	No	No	Yes	Yes	No	No	4	0	0		8.6	98	32000	5	1.9	18		0.662902				7.433	-2	22.5	Discharged alive	0	0	0	0	0		13.367	8.534	8.399	13.88
118	Placebo group	4	0	0	-1	103	14	38.6	151	110	50	30	Yes	2	No	No	No	Yes	No	No	2	0	0		4.8	35	62800	5.7	2.8	28						7.437	-4	20.2	Discharged alive	0	0	0	0	0	61.683	64.514	55.2	112.612	51.974
119	Placebo group	1.5	1	0	0	82	12	38.2	188	130	70	42	Yes	3	Yes	No	Yes	No	No	No	4	1	3	6.8			315840	7.4	3.7	125	46	1.46907	141	4.5	112	7.495	-4	19.6	Discharged alive	0	0	0	0	0		269.353	103.707	35.049	35.678
120	Nitric Oxide group	2.33333	1	-1	-2	87	10	38	131	100	50	48	Yes	2	Yes	No	Yes	Yes	No	No	4	0	0	8.2			800	4.6	3.3	21	8	0.696823	138	4.3	108	7.416	-6	18.8	Discharged alive	0	0	0	0	0		21.752	25.728	27.433	50.283
121	Nitric Oxide group	1.08333	0	-2	0	69	10	37	164	120	50	54	Yes	3	Yes	No	No	No	No	No	4	0	0	4.4	44	52	480	5.7	11.4	23	45		129		127	7.451	-11	12.9	Discharged alive	1	1	1	1	1	305.595	370.842	104.492	121.089	67.615
122	Placebo group	1	1	0	-1	73	9	39	140	110	65	72	Yes	2	Yes	No	Yes	Yes	No	No	4	0	0	7.8	13.9	139	400	5.4	4.9	21	3	0.639687	135	3.3	104	7.36	-7	18.5	Discharged alive	0	0	0	0	0		258.982		68.004	51.286
123	Nitric Oxide group	2	1	-3	-1	77	11	38.5	189	100	50	42	Yes	3	Yes	No	Yes	No	No	No	4	1	2	6.3	13.6	83	200048	5.8	1.5	18		0.72385							Discharged alive	0	0	0	0	0		251.608		46.596	54.219
124	Nitric Oxide group	2.41667	0	-2	-2	83	11	38.6	189	80	40	50	Yes	3	Yes	Yes	No	No	No	No	6	1	3	4.9	17.3	36	27000	30.7	13.8	77	12	0.922038	143	3.7	108	7.261	-13	14.3	Discharged alive	0	0	0	0	0		126.076	200.518	76.985	151.219
125	Nitric Oxide group	1	1	-1	0	73	10	37.8	147	100	45	32	Yes	0	No	No	No	Yes	No	No	2	1	2	10			62480	5.9	3.2	48	12	0.663086				7.144	-16	13.4	Discharged alive	0	0	0	0	0		60.572	57.341	47.906	69.754
126	Placebo group	4	1		1		18	38.7	141	190	100	48	Yes	0	No	No	Yes	Yes	No	No	5	1	1	6.3	7.6	22	125680	3.1	9.4	48	20	0.837723	133	4.8	106	7.367	-12	13	Discharged alive	0	0	0	0	0		894.981	560.993	142.375	140.42
127	Nitric Oxide group	2.25	0	-3	-3	77	9	38	128	100	60	32	Yes	3	No	No	Yes	No	No	No	1	0	0	7.1	30.1	210	0	5.1	1.4	27	19	0.703331	147	3.6	111	7.453	-3	20.8	Discharged alive	0	0	0	0	0	4.617	13.993	39.337	30.037	36.24
128	Placebo group	3	0	-3	-3	83	10	37.6	177	100	55	38	Yes	4	Yes	No	Yes	No	No	No	5	0	0	4.9	8.1	55	126560	5.1	9.4	28	12	0.721168	137	4.1	106	7.352	-10	15.2	Discharged alive	0	0	0	0	0	125.767	118.022	37.413	21.129	39.337
129	Placebo group	1.41667	1	-3	-1	71	10	35.3	161	80	40	55	Yes	2	Yes	Yes	Yes	Yes	Yes	Yes	9	1	2	4.2	20.9	42	6600	8.8	6.4	49	33	1.37852	135	5	112	7.256	-16	11.3	Died in-hospital	1	1	1	1	1	290.294
130	Nitric Oxide group	1.16667	1	-2	-1	71	9	37.7	206	120	55	70	Yes	3	Yes	No	No	No	Yes	No	4	1	1	2.6	24.3	134	160	5.4	2.3	35	11	1.16193	139	4.5	109	7.446	-6	18	Discharged alive	1	1	1	1	1	157.8	296.111	103.73	41.727	66.996
131	Placebo group	2.5	0	0	-1	88	12	36.8	144	130	50	46	Yes	3	Yes	No	Yes	No	No	Yes	5	0	0	4	22.8	447	560	9.1	4	31	21	0.474212	131	4.7	106	7.451	-13	11.5	Discharged alive	0	0	0	0	0	67.916	103.281	58.679	84.786	80.723
132	Placebo group	5	0	-1	1	105	20	38.2	144	120	60	20	Yes	3	No	No	No	No	No	No	2	0	0	7	2.9	21	57280	6.9	5.1	47	28	1.07408	134	4.2	108	7.551	-4	18.7	Discharged alive				1	0	298.864	325.954	66.042	22.64	25.896
133	Placebo group	1.25	0	-4	-3	65	7	37.9	179	100	50	30	Yes	3	No	No	Yes	No	No	No	5	1	1	5.4	10.2	115	106680	7.7	5.4	35	28	0.908673	140	4.2	110	7.436	-4	20.1	Discharged alive	0	0	0	0	0	24.002	28.141	16.474	15.984	51.264
134	Nitric Oxide group	3	0	-2	0	86	14	37.1	183	120	60	53	Yes	2	Yes	No	Yes	Yes	Yes	Yes	8	1	3	6.5	19.2	108	2280	10.6	15.8	98	49	1.78278	142	4.4	118	7.301	-18	7.9	Discharged alive	0	0	0	0	0	97.445	297.32	153.183	54.939	44.383
135	Nitric Oxide group	2	1	-1	-1	81	11	38.1	162	120	55	40	Yes	1	Yes	No	Yes	Yes	No	No	6	1	2	5.5	4.6	40	8160	6.1	3.1	61	51	0.934864	138	4.2	105	7.5	-3	19.9	Discharged alive	0	0	0	0	0		720.432	318.402	124.251	651.242
136	Placebo group	1	1	0	-1	73	8.8	38.1	205	140	50	70	Yes	3	Yes	No	No	No	No	No	5	1	3	4	23.2	466	2320	13.3	10.2	68	44	0.949783	149	4.4	122	7.346	-18	7.4	Discharged alive	0	0	0	0	0	138.442	163.613	70.705	41.688
137	Placebo group	1.5	0	-6	-3	65	8	37.5	200	95	40	64	Yes	3	No	No	Yes	No	Yes	No	3
138	Nitric Oxide group	3	0	3	2	106	18.5	38	158	120	50	52	Yes	2	No	No	Yes	Yes	No	No	2	0	0	5	10	102	5680	6.1	2.5	45	9	0.569716	137	3.8	105	7.409	-6	19	Discharged alive	0	0	0	0	0	1341.05		158.112	147.79	478.663
139	Placebo group	1.5	0	-1	-1	79	10	37.7	174	100	70	52	Yes	2	No	No	No	Yes	No	No	4	0	0	5.4	13	66	110000	8.6	6	31	11	0.673449	145	2.7	109	7.503	-1	22.3	Discharged alive	0	0	0	0	0		975.384	566.62	254.097
140	Nitric Oxide group	4.5	0	-2	-2	97	14	40	158	100	50	49	Yes	4	No	No	Yes	No	Yes	No	3	1	1	5.4	2.8	2	215200	7.2	1.6	58	11	0.916571	131	3.4	101	7.43	-7	16.9	Discharged alive		1	0	1	0		135.93	99.239	68.225	107.719
141	Nitric Oxide group	1	1	-4	-1	65	9	38.7	188	90	50	46	Yes	2	No	No	Yes	Yes	No	No	4	1	3	7	25.4	82	1680	6.7	1.8	147	14	1.57775	140	3.9	117	7.313	-14	12.3	Discharged alive	0	0	0	0	0	315.584	193.726	83.938	136.182	55.118
142	Nitric Oxide group	3.5	0	-2	0	92	15	36.4	134	120	80	44	Yes	1	No	No	Yes	Yes	No	No	3	0	0	8.4	5.9	153	80	4.5	1.1	32	18	0.737582	134		108	7.249	-10	16.9	Discharged alive	0	0	0	0	0		45.456	71.182	85.651	84.161
143	Nitric Oxide group	2.5	0	-2	-3	85	10	37.6	180	90	50	26	Yes	3	No	No	No	No	Yes	No	0	0	0	5	10.7	59	129400	6.7	4.3	38	14	0.732979	140	3.3	104	7.467	-1	22.4	Discharged alive	0	0	0	0	0	216.497	199.415	87.777	53.606	81.108
144	Nitric Oxide group	1	0	-3	-2	68	8	38.1	205	90	40	78	Yes	1	No	No	Yes	Yes	Yes	No	6	1	1	7.4	11.8	122	18480	4.6	3.2	37	24	0.732905	142	4.5	110	7.278	-12	14.8	Discharged alive	0	0	0	0	0	15.947	16.674	17.28	26.51	29.405
145	Placebo group	2.5	0	-3	-2	78	10	37.5	136	100	60	26	Yes	1	Yes	No	Yes	Yes	No	No	5	1	1	11.2	20.4	171	42800	6.3	1.1	38		0.678881							Discharged alive	0	0	0	0	0	223.883	135.761	111.323	81.887	133.526
146	Placebo group	3	1	-4	-2	79	12	37.3	164	120	60	56	Yes	3	Yes	Yes	Yes	No	Yes	Yes	7	0	0	4	18.7	186	3320	8.9	5.9	35		0.759795							Discharged alive	0	0	0	0	0		221.106	113.994	61.113	117.871
147	Placebo group	1.08333	1	-2	-3	70	7	37.8	179	100	60	84	Yes	0	No	No	Yes	Yes	No	No	5	0	0	3	8.3	89	360	7.2	7	18	13	1.08156	136	4.3	103				Died in-hospital	1	1	1	1	1	293.331
148	Nitric Oxide group	2.25	1	-4	-2	74	10	40.1	165	100	50	34	Yes	3	No	No	Yes	No	No	No	2	1	1		12.8	16	22480	8.5	2.7	27		1.02162							Discharged alive	0	0	0	0	0	284.301	337.396	139.932	97.176	107.932
149	Placebo group	2	1	2	-1	91	11	39.5	173	110	50	57	Yes	5	Yes	No	Yes	No	Yes	No	3	0	0	5.6	5.8	71	290560	8.8	4.4	41	16		137	3.8	105	7.423	-4	20.8	Discharged alive	0	0	0	0	0	82.167	89.902	32.953	35.85	4.5
150	Nitric Oxide group	2	1	1	2	87	14	35	102	90	50	26	No	2	No	No	No	Yes	No	No	2	0	0		4.9	175	13440	6.7	2.2	27		0.716785				7.268	-12	14.8	Discharged alive	0	0	0	0	0	4.5	45.538	14.412	11.054	6.195
151	Placebo group	1.66667	1	-1	0	80	11	38.3	170	115	60	42	Yes	2	No	No	Yes	Yes	No	No	5	1	1	3.4	18.7	44	104480	8.7	2	35		0.883528				7.458	-5	19.2	Discharged alive	0	0	0	0	0	385.302	122.992	46.138	31.293	61.733
152	Nitric Oxide group	3	1	-1	-2	92	12	39	164	100	60	59	Yes	4	No	No	Yes	No	No	No	2	0	0		6.9	76	130000	6.9	2.6	37	4	0.749181	134	3.4	102	7.409	-5	19.4	Discharged alive	0	0	0	0	0	189.049	313.452	120.249	96.637	208.139
153	Nitric Oxide group	2.5	1	-4	-3	78	10	40.3	183	100	80	60	Yes	1	No	Yes	Yes	Yes	No	No	5	1	3	10	23.3	433	0	12.1	2.9	162	74	2.68923	147	3.3	123	7.486	-6	17.3	Discharged alive	0	0	0	0	0	97.845	57.202	68.147	281.303	85.36
154	Placebo group	1	0	-4	-2	66	8	39.1	173	110	40	34	Yes	3	No	No	Yes	No	No	Yes	4	1	1	8.5	15.7	50	122400	6.5	2.3	30	25	0.975434	141	4.8	108				Discharged alive		1	0	1	0	161.03	74.355	44.227	60.605	39.087
155	Placebo group	1.41667	1	-4	0	71	11	39.4	206	100	60	62	Yes	0	Yes	No	Yes	Yes	No	No	6	1	3	8.6	14.7	15	149920	8.2	8.1	56	35	0.837251	138	5.2	110	7.352	-11	14.5	Discharged alive	0	0	0	0	0	366.007	640.931	408.696	160.013	87.576
156	Placebo group	1	1	0	-1	75	9	39.9	179	80	40	82	Yes	0	Yes	No	Yes	Yes	Yes	No	7	1	3	4.7			0	7.9	5.1	23	35	0.853336				7.361	-3	21.9	Died in-hospital	1	1	1	1	1	293.118	250.725
157	Placebo group	2	1	0	-1	85	11	37.1	144	90	40	40	Yes	1	No	No	Yes	Yes	No	No	3	1	2	7.4			26720	5.8		52	20	0.846832	139	3.7	103	7.427	-1	22.9	Discharged alive		1	0	1	0	411.22	506.972	196.477	188.781	183.227
158	Placebo group	4	0	-4	-2	86	12	38.4	162	125	60	57	Yes	1	No	No	Yes	Yes	No	No	5	0	0	3	10.5	95	2300	6.4	5.4	22	25	0.605681	139	3.9	111	7.374	-15	10.2	Discharged alive	0	0	0	0	0	2057.09	1492.39	295.543	94.929	273.915
159	Placebo group	3.41667	0	0	-1	97	13	36.5	155	100	60	43	Yes	0	Yes	No	No	Yes	Yes	No	4	0	0	10.5	10.7	239	240	7.7	6.9	18	22	0.460262	133	4.7	107	7.27	-12	14.6	Died in-hospital	1	1	1	1	1	95.362
160	Nitric Oxide group	1.25	1	-2	1	72	11	37.6	172	90	50	60	Yes	3	Yes	No	Yes	No	No	Yes	5	0	0	4.2	12.1	116	1336	6.4	1.6	24	9	0.690717	137	4	104	7.483	-1	22.7	Discharged alive	0	0	0	0	0	314.86	338.121	102.204	78.227	155.62
161	Placebo group	3.5	0		-2		12	36.8	190	90	50	34	Yes	3	No	No	Yes	No	No	No	1	0	0	12	8.8	366	25280	7.4	2.1	29	8	0.596395	132		106	7.354	-3	22.9	Discharged alive	0	0	0	0	0	80.495	62.528	47.062	28.347	39.09
162	Nitric Oxide group	3	0	1	0	98	14	36.4	155	110	60	33	Yes	3	No	No	Yes	No	No	No	1	0	0	5.6	9.7	113	0	6.6	2.1	29	11	0.447326	143	4.4	110	7.391	-3	22	Discharged alive	0	0	0	0	0	66.782	63.955	75.505	55.736	57.153
163	Placebo group	3	1	2	0	101	15	37.7	142	100	40	70	Yes	2	Yes	No	Yes	Yes	Yes	No	6	0	0	2.8	6.8	78	200	10	9.5	18	22	0.258379	136	4.4	107	7.471	-10	14	Discharged alive		1	0	1	0	276.321	169.967	43.448	30.035
164	Placebo group	1.16667	1	-3	0	69	11	37.1	176	90	40	57	Yes	2	Yes	No	Yes	Yes	Yes	No	6	0	0	5	62.1	489	4040	8.7	9.4	18	8	0.704267	141	3.9	113	7.413	-12	12.9	Discharged alive	0	0	0	0	0	111.422	102.204	52.14	60.609
165	Placebo group	2.5	1	2	-2	95	11	37.2	139	95	60	32	No	2	Yes	No	No	Yes	No	No	4	0	0	5.6	10.1	37	40320	6.1	6.5	19	9	0.676865	135	4	109				Discharged alive	0	0	0	0	0	118.178	103.651	47.654	25.545	30.584
166	Nitric Oxide group	2.25	1	2	1	95	15	38.4	161	30	90	40	Yes	2	Yes	No	Yes	Yes	No	Yes	6	1	1	8.6	13.2	38	2428	11.1	4.1	34	14	0.904586	132	3.9	99	7.439	-4	20.2	Discharged alive	0	0	0	0	0	197.941	145.75	123.616	83.705
167	Placebo group	2.16667	1	-1	-2	83	10	39.5	200	110	50	25	Yes	3	Yes	No	Yes	No	No	No	5	0	0	4.2	6.8	60	58800	10.3	6.7	23	8	0.582471	136	3.6	102	7.453	-4	19.9	Discharged alive	0	0	0	0	0	456.424	345.16		56.003	64.353
168	Placebo group	1	0	0	-1	75	9	39	174	110	50	42	Yes	3	Yes	No	Yes	No	No	No	4	1	1	6.8	24.4	122	56000	7.1	3.8	34	11	0.723779	135	3.4	103	7.438	-4	20.6	Discharged alive	0	0	0	0	0			97.15	39.144	144.764
169	Placebo group	6	1	-2	-2	106	15	36.6	156	120	50	46	Yes	3	Yes	No	Yes	No	Yes	Yes	6	0	0	3.4	25.8	338	0	13.3	9.4	39	33	0.780234	137	4.2	109	7.39	-9	15.7	Discharged alive				1	0			72.33	49.607
170	Nitric Oxide group	5.5	0	-4	-3	94	12	36.7	174	100	40	66	Yes	2	Yes	No	Yes	Yes	Yes	No	7	1	2	6.6	13.3	69	137600	6.8	5.3	85	37	1.04705	145	3.7	119	7.418	-13	11.6	Discharged alive				1	0		87.757	55.333		47.769
171	Nitric Oxide group	2.5	1	-3	-3	81	10	35.1	202	100	50	25	Yes	1	No	No	Yes	Yes	No	No	3	0	0	7.6	11	271	2200	5.4	1	34	3	0.657238	138	4.7	106	7.392	-2	22.8	Discharged alive	0	0	0	0	0			9.197	12.538	9.206
172	Placebo group	1	1	-2	0	72	10	38.8	186	100	50	53	Yes	3	Yes	No	Yes	No	Yes	No	4	0	0	6	34.4	15	2600	5.8	8.1	18	13		128		108	7.439	-13	11.4	Discharged alive		1	0	1	0	419.855		100.849	72.65	80.346
173	Nitric Oxide group	2	1	1	0	88	12	38.8	170	100	60	46	Yes	3	Yes	No	Yes	No	No	No	3	0	0	5.6	11.3	46	29080	4.7	3.4	26	24	0.837816	133		113	7.467	-9	15	Discharged alive	0	0	0	0	0		185.843	67.68	28.924	80.721
174	Nitric Oxide group	1.16667	1	1	1	80	11	37	186	40	0	62	Yes	2	Yes	No	Yes	Yes	Yes	No	7	1	3	2.6	21.4	38	960	6.3	4.8	82	24	1.66368	140	4.5	113	7.193	-23	5.3	Died in-hospital	1	1	1	1	1		2311.59
175	Nitric Oxide group	3	1	1	0	97	14	36.8	135	87	40	33	No	3	No	No	Yes	No	Yes	Yes	5	1	1	2	35.1	259	160	8.9	3.6	54	77	0.754837	146	4.2	119	7.5	-11	12.6	Discharged alive		1	0	1	0		548.219	181.436		104.175
176	Placebo group	2.5	0	-4	0	78	13	37.1	168	98	30	26	Yes	1	Yes	No	Yes	Yes	No	Yes	6	1	3	5.2	18.1	43	1200	4.5	2	213	56		135	4.3	110	7.268	-16	10.9	Died in-hospital	1	1	1	1	1	2624.88	2357.02
177	Nitric Oxide group	1	0	-3	-1	65	9	39.8	157	100	50	34	Yes	2	Yes	No	No	Yes	Yes	No	4	1	1	5	6.5	69	209440	7.2	2	27	25		136		113	7.46	-5	18.5	Discharged alive		1	0	1	0	63.241		53.244	32.864	28.313
178	Nitric Oxide group	1	1	-2	-3	71	7	38.6	210	100	50	100	Yes	2	Yes	No	Yes	Yes	Yes	Yes	7	1	1	1	10.5	91	135440	9.3	4	38	32	0.776336	140		118				Discharged alive	0	0	0	0	0	216.332	198.569	59.522	41.217	28.307
179	Placebo group	2	0	-1	2	80	14	37.9	173	100	40	56	Yes	1	Yes	Yes	No	Yes	No	No	6	0	0	4	12.5	124	15360	15.5	7.9	18	16	0.641049	136	3.7	106	7.413	-10	14.3	Discharged alive	0	0	0	0	0	974.988	938.31	178.038	89.028	65.136
180	Placebo group	1.5	1	-1	-2	79	8	37.3	210	90	45	62	Yes	2	Yes	Yes	Yes	Yes	Yes	Yes	9	1	1	5	16.9	111	154000	3.2		36	29	1.24637	140	4.6	115	7.246	-22	5.6	Discharged alive	0	0	0	0	0	1071.47	1724.16	528.085	123.36	489.4
